# Supplementary material for: Prognostic factors, therapeutic approaches, and distinct immunobiologic features in patients with primary mediastinal large B-cell lymphoma on long-term follow-up
Source: PubMed Central journal article supplement (PMC7198569; doi:10.1038/s41408-020-0312-7), 2020-05-04

**Suppl. Figure 1. Prognostic factors at diagnosis. (A)** Elderly age was associated with significantly poorer overall survival. Advanced stage and elevated LDH levels showed nonsignificant trends toward poorer overall survival. **(B)** Low PET SUV<sub>max</sub>, CD30 positivity, and high absolute lymphocyte counts showed nonsignificant trends toward favorable impact on progression-free survival.

**A**

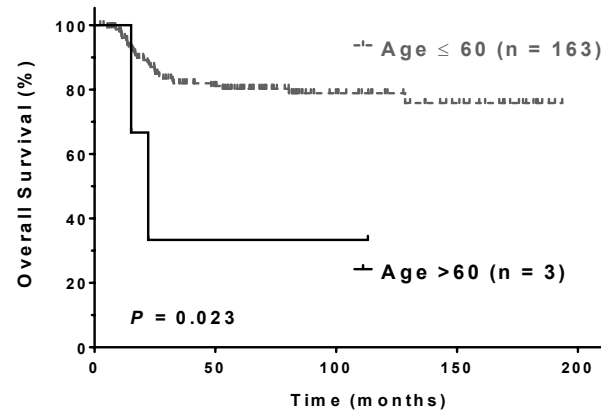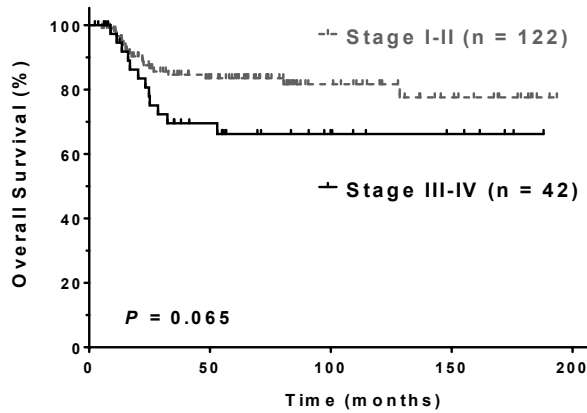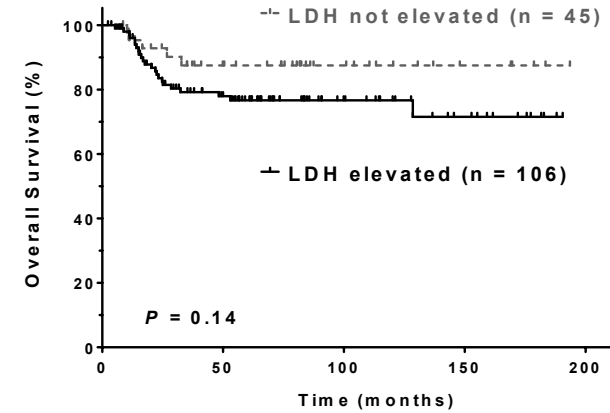

**B**

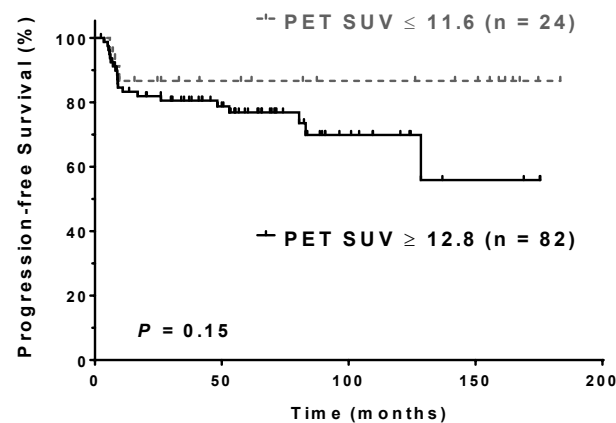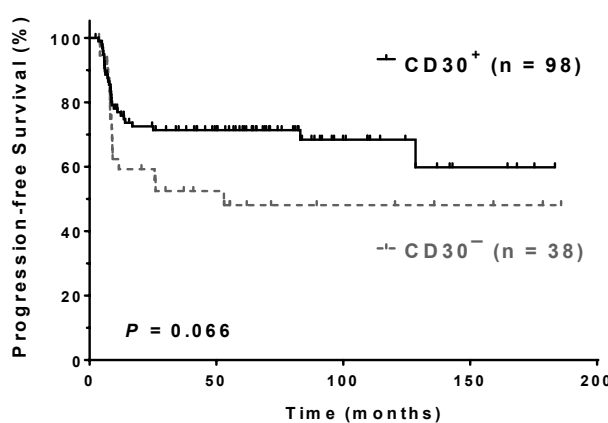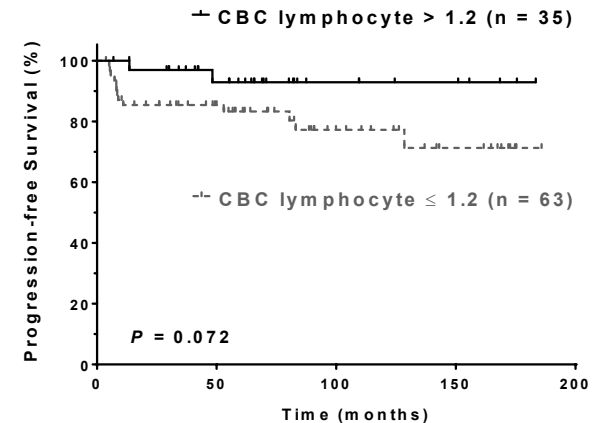

**Suppl. Figure 2. Treatment options and prognosis. (A)** Radiation therapy as consolidation did not have a significant effect on survival in PMBCL. **(B)** In relapsed/refractory PMBCL patients, radiation therapy after salvage therapy did not have a significant effect on survival.

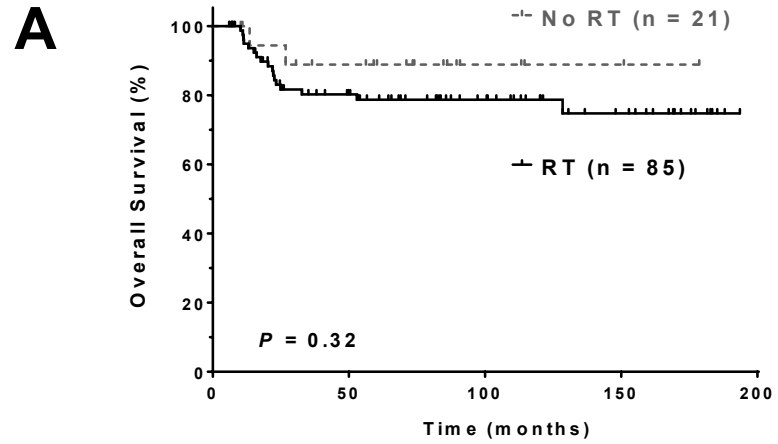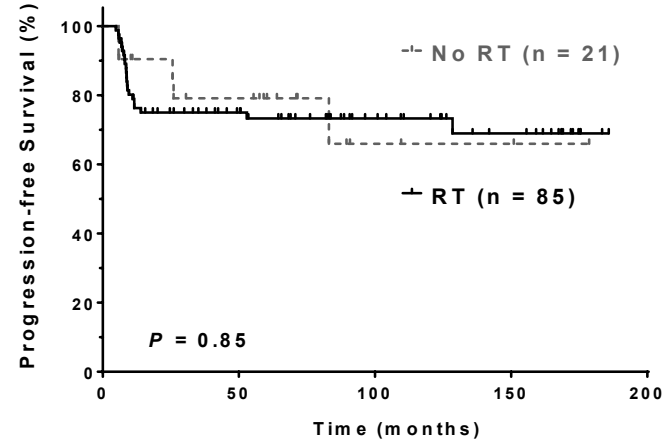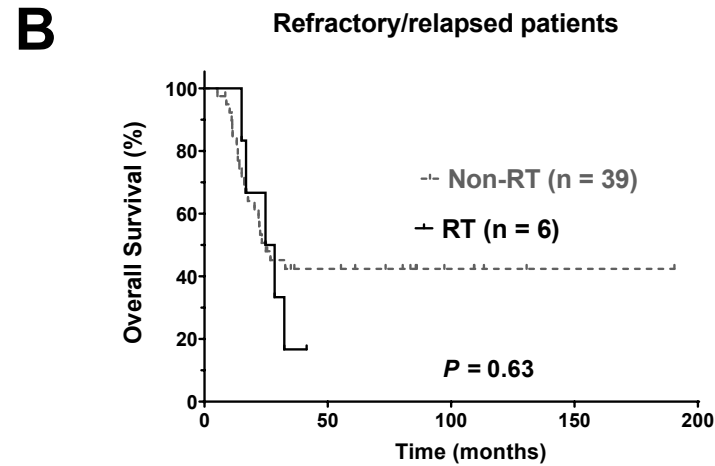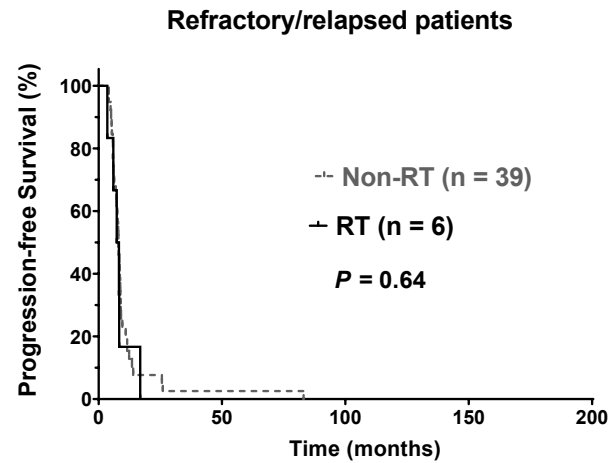

**Suppl. Figure 3. Treatment options and prognosis. (A)** Stem cell transplant improved overall survival in patients with relapsed/refractory PMBCL regardless of frontline treatment regimens. **(B)** Stem cell transplant did not show survival benefit in PMBCL patients without relapse after chemotherapy with a CR/PR.

**A**

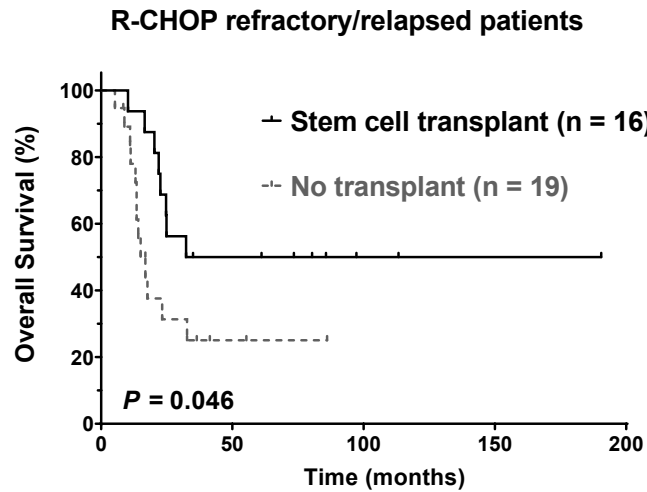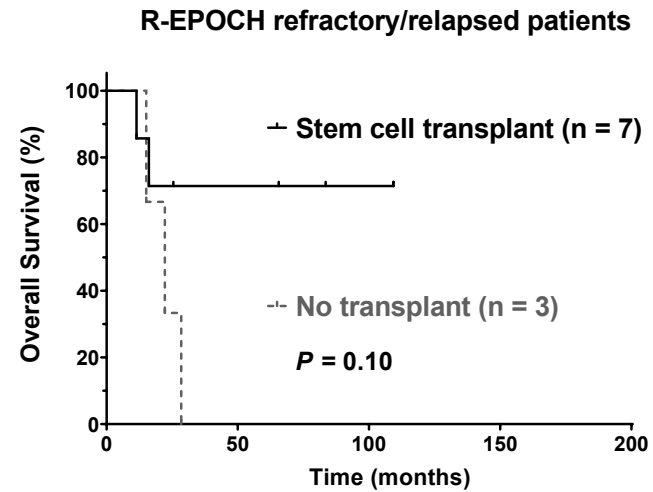

**B**

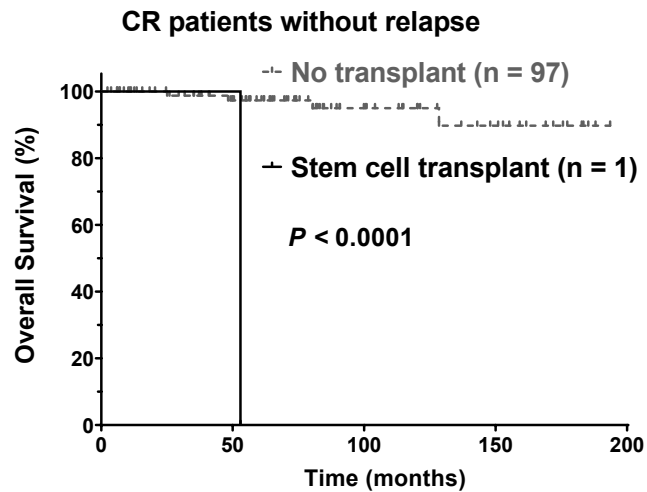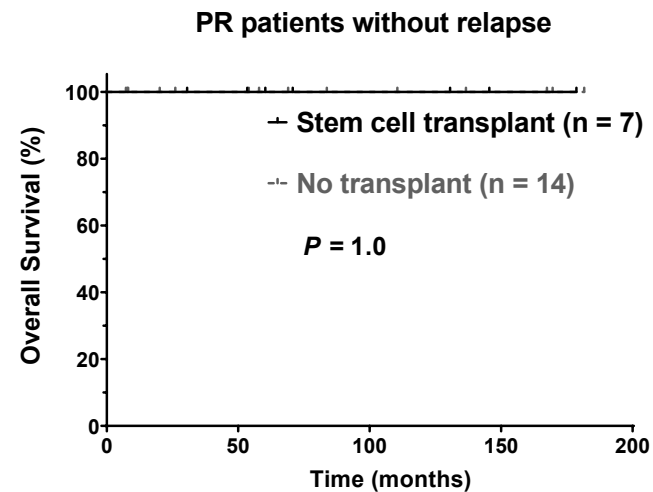

**Suppl. Figure 4.** Additional survival curves for CTLA-4 expression in T cells, PD-1 expression in T cells, and PD-L2 expression in B cells in PMBCL.

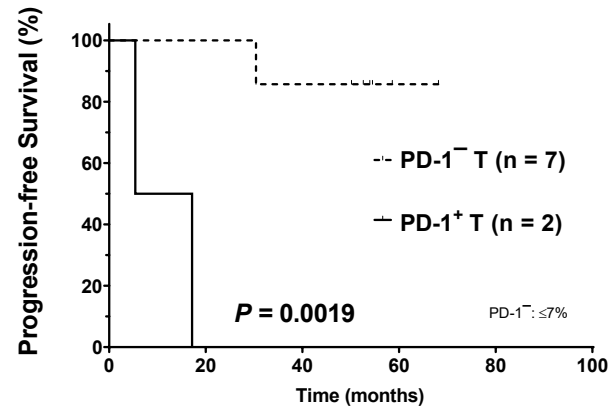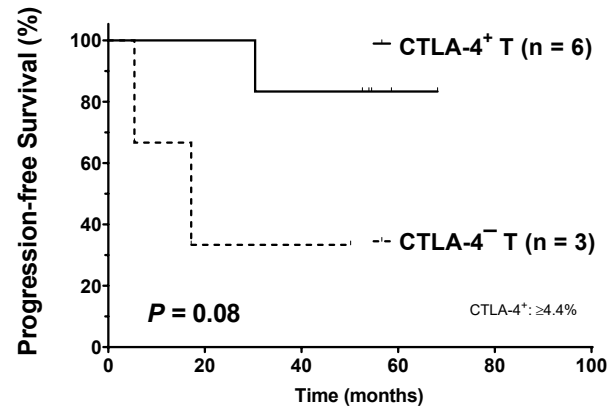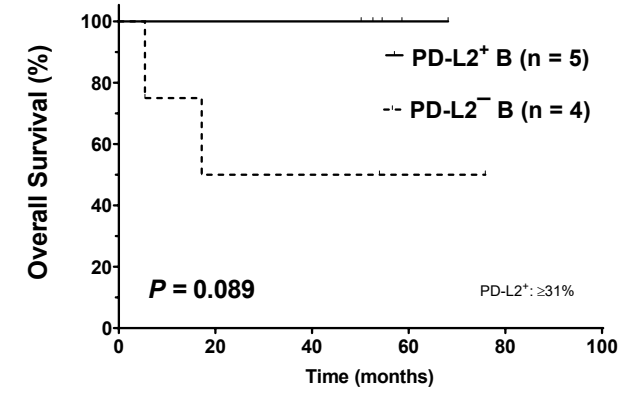



**Suppl. Figure 6. miRNA profile for PMBCL. (A)** Heatmap for top 10 upregulated or downregulated miRNAs in dead versus alive PMBCL patients. **(B)** Heatmap for 25 downregulated and 20 upregulated miRNAs in PMBCL patients with progression/relapse events compared with those without progression/relapse events.

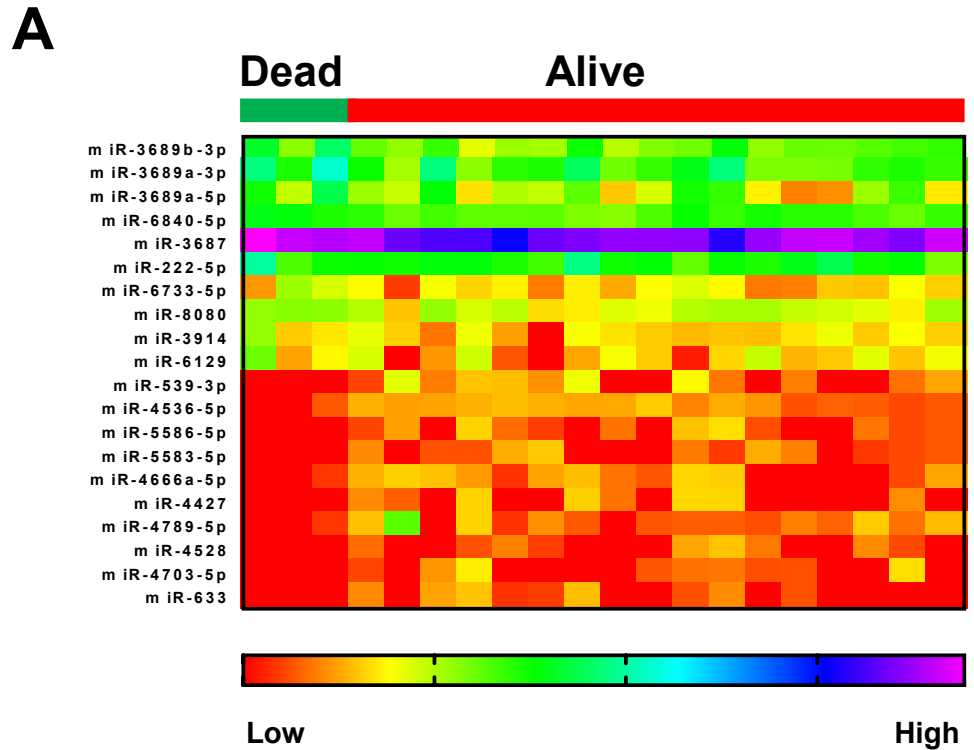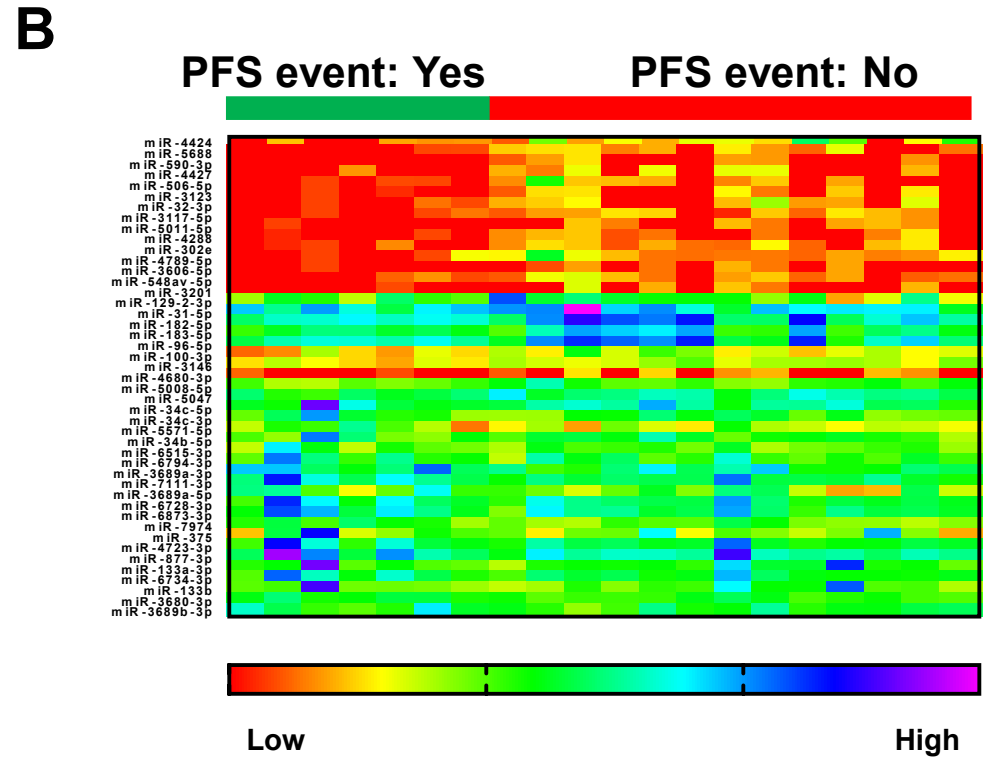

Supplement: 41408_2020_312_MOESM2_ESM.pdf [file 41408_2020_312_MOESM2_ESM.pdf]
