# Supplementary material for: Prognostic factors, therapeutic approaches, and distinct immunobiologic features in patients with primary mediastinal large B-cell lymphoma on long-term follow-up
Source: PubMed Central journal article supplement (PMC7198569; doi:10.1038/s41408-020-0312-7), 2020-05-04
Supplement: 41408_2020_312_MOESM1_ESM.pdf [file 41408_2020_312_MOESM1_ESM.pdf]

**Supplementary Table 1.** Clinicopathologic characteristics of patients in the overall cohort

| <b>Characteristic</b>          | <b>n (%)</b> |
|--------------------------------|--------------|
| <b>Age</b>                     |              |
| ≤60 years                      | 163 (98.2)   |
| >60 years                      | 3 (1.8)      |
| <b>Sex</b>                     |              |
| Male                           | 72 (43.4)    |
| Female                         | 94 (56.6)    |
| <b>Stage</b>                   |              |
| I-II                           | 121 (73.8)   |
| III-IV                         | 43 (26.2)    |
| <b>B symptoms</b>              |              |
| No                             | 100 (60.6)   |
| Yes                            | 65 (39.4)    |
| <b>Serum LDH</b>               |              |
| Normal                         | 45 (29.8)    |
| Elevated                       | 106 (70.2)   |
| <b>No. of extranodal sites</b> |              |
| 0-1                            | 155 (94.5)   |
| ≥2                             | 9 (5.5)      |
| <b>ECOG performance status</b> |              |
| 0-1                            | 138 (84.7)   |
| ≥2                             | 25 (15.3)    |
| <b>Mediastinal mass size</b>   |              |
| ≤10 cm                         | 70 (47.3)    |
| >10 cm                         | 78 (52.7)    |
| <b>IPI risk group</b>          |              |
| 0-1                            | 117 (74.1)   |
| >1                             | 41 (25.9)    |
| <b>First-line Chemotherapy</b> |              |
| R-CHOP                         | 89 (53.6)    |
| R-EPOCH                        | 55 (33.1)    |
| R-HCVAD                        | 19 (11.4)    |
| Others                         | 3 (1.8)      |
| <b>Treatment response</b>      |              |
| Complete                       | 118 (71.1)   |
| Partial                        | 39 (23.5)    |
| Stable disease                 | 2 (1.2)      |
| Progressive disease            | 7 (4.2)      |
| <b>Ki-67</b>                   |              |
| <70%                           | 37 (41.6)    |

|                                               |            |
|-----------------------------------------------|------------|
| ≥70%                                          | 52 (58.4)  |
| <b>PET SUV<sub>max</sub> at diagnosis</b>     |            |
| ≤11.6                                         | 24 (22.6)  |
| >11.6                                         | 82 (77.4)  |
| <b>End-of-treatment PET SUV<sub>max</sub></b> |            |
| ≤5.4                                          | 116 (89.9) |
| >5.4                                          | 13 (10.1)  |
| <b>CBC lymphocyte count</b>                   |            |
| ≤1.2.1×10 <sup>9</sup> /L                     | 63 (64.3)  |
| >1.2.1×10 <sup>9</sup> /L                     | 35 (35.7)  |
| <b>CBC lymphocyte/monocyte ratio</b>          |            |
| ≤0.1                                          | 52 (53.0)  |
| >0.1                                          | 46 (47.0)  |
| <b>CD30 expression</b>                        |            |
| Negative                                      | 38 (27.9)  |
| Positive                                      | 98 (72.1)  |
| <b>MUM1 expression</b>                        |            |
| Negative                                      | 8 (15.4)   |
| Positive                                      | 44 (84.6)  |
| <b>Radiation therapy</b>                      |            |
| No                                            | 21 (19.8)  |
| Yes                                           | 85 (80.2)  |
| <b>Stem cell transplant</b>                   |            |
| No                                            | 135 (81.3) |
| Yes                                           | 31 (18.7)  |

PMBCL, primary mediastinal large B-cell lymphoma; LDH: lactate dehydrogenase; ECOG: Eastern Cooperative Oncology Group; IPI: International Prognostic Index; R-CHOP: rituximab, cyclophosphamide, doxorubicin, vincristine, and prednisone; R-EPOCH: rituximab, etoposide, prednisone, vincristine, cyclophosphamide, and doxorubicin; R-HCVAD: rituximab, cyclophosphamide, mesna, doxorubicin, vincristine, dexamethasone, methotrexate, and cytarabine; PET: positron emission tomography; SUV<sub>max</sub>: maximum standardized uptake value; CBC: complete blood count

**Supplemental Table 2.** Comparison between patients who achieved and who did not achieve CR after the first line treatment

| <b>Characteristic</b>          | <b>CR<br/>n (%)</b> | <b>Non-CR<br/>n (%)</b> | <b>P</b>      |
|--------------------------------|---------------------|-------------------------|---------------|
| <b>Age</b>                     |                     |                         |               |
| ≤60 years                      | 115 (97.5)          | 48 (100)                | 0.56          |
| >60 years                      | 1 (2.5)             | 0 (0)                   |               |
| <b>Sex</b>                     |                     |                         |               |
| Female                         | 72 (61.0)           | 22 (45.8)               | 0.085         |
| Male                           | 46 (39.0)           | 26 (54.2)               |               |
| <b>Stage</b>                   |                     |                         |               |
| I-II                           | 82 (70.7)           | 39 (81.2)               | 0.18          |
| III-IV                         | 34 (29.3)           | 9 (18.8)                |               |
| <b>B symptoms</b>              |                     |                         |               |
| No                             | 79 (67.5)           | 21 (43.8)               | <b>0.0053</b> |
| Yes                            | 38 (32.5)           | 27 (56.3)               |               |
| <b>Serum LDH</b>               |                     |                         |               |
| Normal                         | 35 (32.4)           | 10 (23.3)               | 0.33          |
| Elevated                       | 73 (67.6)           | 33 (76.7)               |               |
| <b>No. of extranodal sites</b> |                     |                         |               |
| 0-1                            | 110 (94.8)          | 45 (93.7)               | 0.72          |
| ≥2                             | 6 (5.17)            | 3 (6.3)                 |               |
| <b>ECOG performance status</b> |                     |                         |               |
| 0-1                            | 95 (81.9)           | 43 (91.5)               | 0.15          |
| ≥2                             | 21 (18.1)           | 4 (8.5)                 |               |
| <b>Mediastinal mass size</b>   |                     |                         |               |
| ≤10 cm                         | 53 (52.0)           | 17 (37.0)               | 0.117         |
| >10 cm                         | 49 (48.0)           | 29 (63.0)               |               |
| <b>Pleural effusion</b>        |                     |                         |               |
| No                             | 113 (98.3)          | 45 (93.7)               | 0.11          |
| Yes                            | 2 (1.7)             | 3 (6.3)                 |               |
| <b>IPI risk group</b>          |                     |                         |               |
| 0-1                            | 82 (73.2)           | 36 (78.3)               | 0.55          |
| >1                             | 30 (26.8)           | 10 (21.7)               |               |
| <b>Chemotherapy</b>            |                     |                         |               |
| R-CHOP                         | 57(48.3)            | 32 (66.7)               | <b>0.023*</b> |
| R-EPOCH                        | 44 (37.3)           | 11 (22.9)               |               |
| R-HCVAD                        | 16 (13.6)           | 3 (6.3)                 |               |
| Others                         | 1 (0.8)             | 2 (4.2)                 |               |
| <b>Ki-67 index</b>             |                     |                         |               |
| <70%                           | 30 (46.9)           | 7 (28.0)                | 0.15          |
| ≥70%                           | 34 (53.1)           | 18 (72.0)               |               |
| <b>CD30 expression</b>         |                     |                         |               |
| -                              | 26 (27.1)           | 12 (30.0)               | 0.83          |
| +                              | 70 (72.9)           | 28 (70.0)               |               |
| <b>CD5 expression</b>          |                     |                         |               |
| -                              | 52 (94.5)           | 26 (100)                | 0.55          |

|                                               |           |           |                   |
|-----------------------------------------------|-----------|-----------|-------------------|
| +                                             | 3 (5.5)   | 0 (0)     |                   |
| <b>CD23 expression</b>                        |           |           |                   |
| -                                             | 7 (22.6)  | 6 (40)    | 0.3               |
| +                                             | 24 (77.4) | 9 (60)    |                   |
| <b>CD10 expression</b>                        |           |           |                   |
| -                                             | 74 (88.1) | 26 (86.7) | 1.0               |
| +                                             | 10 (11.9) | 4 (13.3)  |                   |
| <b>MUM1 expression</b>                        |           |           |                   |
| -                                             | 7 (17.1)  | 1 (9.1)   | 1.0               |
| +                                             | 34 (82.9) | 10 (90.9) |                   |
| <b>BCL2 expression</b>                        |           |           |                   |
| -                                             | 5 (10.2)  | 3 (15.8)  | 0.68              |
| +                                             | 44 (89.8) | 16 (84.2) |                   |
| <b>BCL6 expression</b>                        |           |           |                   |
| -                                             | 3 (5.2)   | 5 (26.3)  | <b>0.019</b>      |
| +                                             | 55 (94.8) | 14 (73.7) |                   |
| <b>CBC lymphocyte count</b>                   |           |           |                   |
| ≤1.2.1×10 <sup>9</sup> /L                     | 50 (64.9) | 13 (61.9) | 0.8               |
| >1.2.1×10 <sup>9</sup> /L                     | 27 (35.1) | 8 (38.1)  |                   |
| <b>CBC lymphocyte:monocyte ratio</b>          |           |           |                   |
| ≤0.1                                          | 40 (52.0) | 12 (57.1) | 0.81              |
| >0.1                                          | 37 (48.1) | 9 (42.9)  |                   |
| <b>PET SUV<sub>max</sub> at diagnosis</b>     |           |           |                   |
| ≤11.6                                         | 18 (22.5) | 6 (23.1)  | 1.0               |
| >11.6                                         | 62 (77.5) | 20 (76.9) |                   |
| <b>End-of-treatment PET SUV<sub>max</sub></b> |           |           |                   |
| ≤5.4                                          | 96 (100)  | 20 (60.6) | <b>&lt;0.0001</b> |
| >5.4                                          | 0 (0)     | 13 (39.4) |                   |

CR: complete response; LDH: lactate dehydrogenase; ECOG: Eastern Cooperative Oncology Group; IPI: International Prognostic Index; R-CHOP: rituximab, cyclophosphamide, doxorubicin, vincristine, and prednisone; R-EPOCH: rituximab, etoposide, prednisone, vincristine, cyclophosphamide, and doxorubicin; R-HCVAD: rituximab, cyclophosphamide, mesna, doxorubicin, vincristine, dexamethasone, methotrexate, and cytarabine; CBC: complete blood count; PET: positron emission tomography; SUV: standardized uptake value.

\*R-CHOP vs. R-EPOCH plus R-HCVAD.

Significant *P* values are in bold.

**Supplementary Table 3.** Multivariate survival analysis for four significant factors adjusting for clinical parameters composing the IPI by univariate analysis

| Variable                                                           | OS        |             |              | PFS    |             |                  |
|--------------------------------------------------------------------|-----------|-------------|--------------|--------|-------------|------------------|
|                                                                    | HR        | 95% CI      | <i>P</i>     | HR     | 95% CI      | <i>P</i>         |
| <b>Ki-67 and clinical factors</b>                                  |           |             |              |        |             |                  |
| Age >60 years                                                      | 81.0      | 4.39-1495.4 | <b>0.003</b> | 17.89  | 1.81-176.36 | <b>0.013</b>     |
| Stage II-III                                                       | 1.65      | 0.55-4.95   | 0.37         | 2.51   | 1.04-6.06   | <b>0.04</b>      |
| Elevated LDH                                                       | 2.03      | 0.45-9.09   | 0.36         | 1.28   | 0.46-3.59   | 0.63             |
| Extranodal sites >1                                                | 0.46      | 0.053-4.05  | 0.49         | 0.66   | 0.14-3.08   | 0.59             |
| ECOG >1                                                            | <0.001    | 0-N/A       | 0.98         | 0.11   | 0.015-0.88  | <b>0.037</b>     |
| Ki-67 ≥70%                                                         | 10.64     | 1.38-81.8   | <b>0.023</b> | 4.54   | 1.54-13.40  | <b>0.006</b>     |
| <b>MUM1 and clinical factors</b>                                   |           |             |              |        |             |                  |
| Age >60 years                                                      | 1.93      | 0.13-28.44  | 0.63         | 1.50   | 0.16-13.7   | 0.72             |
| Stage II-III                                                       | 2.67      | 0.32-22.26  | 0.36         | 5.88   | 1.34-25.72  | <b>0.019</b>     |
| Elevated LDH                                                       | 421943.14 | 0-2.18E+265 | 0.97         | 5.69   | 0.64-50.68  | 0.12             |
| Extranodal sites >1                                                | <0.001    | 0-5.77E+277 | 0.97         | <0.001 | 0-N/A       | 0.99             |
| ECOG >1                                                            | <0.001    | 0-3.45E256  | 0.97         | 0.095  | 0.01-0.91   | <b>0.041</b>     |
| MUM1 positive                                                      | 0.12      | 0.015-0.96  | <b>0.045</b> | 0.53   | 0.12-2.37   | 0.40             |
| <b>CBC lymphocyte:monocyte ratio and clinical factors</b>          |           |             |              |        |             |                  |
| Age >60 years                                                      | 5.65      | 0.61-52.3   | 0.13         | 7.19   | 0.78-66.20  | 0.082            |
| Stage II-III                                                       | 2.36      | 0.51-10.82  | 0.27         | 5.88   | 1.34-25.72  | <b>0.019</b>     |
| Elevated LDH                                                       | 518287.1  | 0-N/A       | 0.98         | 1.12   | 0.22-5.77   | 0.90             |
| Extranodal sites >1                                                | <0.001    | 0-N/A       | 0.99         | <0.001 | 0-N/A       | 0.99             |
| ECOG >1                                                            | 0.24      | 0.025-2.20  | 0.21         | 0.25   | 0.047-1.32  | 0.10             |
| Lymphocyte:monocyte ratio >11.6                                    | 0.64      | 0.15-2.74   | 0.55         | 0.24   | 0.06-0.99   | <b>0.048</b>     |
| <b>End-of-treatment PET SUV<sub>max</sub> and clinical factors</b> |           |             |              |        |             |                  |
| Age >60 years                                                      | <0.001    | 0-N/A       | 1.0          | <0.001 | 0-N/A       | 0.99             |
| Stage II-III                                                       | 3.48      | 1.03-11.7   | <b>0.044</b> | 2.84   | 1.10-7.35   | <b>0.031</b>     |
| Elevated LDH                                                       | 4.02      | 0.49-32.95  | 0.19         | 2.32   | 0.64-8.39   | 0.20             |
| Extranodal sites >1                                                | <0.001    | 0-N/A       | 0.99         | <0.001 | 0-N/A       | 0.98             |
| ECOG >1                                                            | 0.26      | 0.029-2.23  | 0.22         | 0.34   | 0.071-1.66  | 0.18             |
| End-of-treatment PET SUV <sub>max</sub> >5.4                       | 3.40      | 0.90-12.78  | 0.071        | 6.21   | 2.24-17.17  | <b>&lt;0.001</b> |

OS: overall survival; PFS: progression-free survival; HR, hazard ratio; LDH: lactate dehydrogenase; ECOG: Eastern Cooperative Oncology Group; CBC: complete blood count; PET: positron emission tomography; SUV<sub>max</sub>: maximum standardized uptake value.

Significant *P* values are in bold.

**Supplementary Table 4.** Clinicopathologic characteristics of patient groups

| <b>Characteristic</b>          | End-of-treatment PET SUV ≤5.4<br>n (%) | End-of-treatment PET SUV >5.4<br>n (%) | <i>P</i>           | No SCT<br>n (%) | SCT<br>n (%) | <i>P</i>           |
|--------------------------------|----------------------------------------|----------------------------------------|--------------------|-----------------|--------------|--------------------|
| <b>Age</b>                     |                                        |                                        |                    |                 |              |                    |
| ≤60 years                      | 115 (99.1)                             | 13 (100)                               | 1.0                | 132 (97.8)      | 31 (100)     | 1.0                |
| >60 years                      | 1 (0.9)                                | 0 (0)                                  |                    | 3 (2.2)         | 0 (0)        |                    |
| <b>Sex</b>                     |                                        |                                        |                    |                 |              |                    |
| Female                         | 66 (56.9)                              | 5 (38.5)                               | 0.25               | 76 (56.3)       | 18 (58.1)    | 0.84               |
| Male                           | 50 (43.1)                              | 8 (61.5)                               |                    | 59 (43.7)       | 13 (41.9)    |                    |
| <b>Stage</b>                   |                                        |                                        |                    |                 |              |                    |
| I-II                           | 85 (73.9)                              | 9 (69.2)                               | 0.74               | 101 (74.8)      | 20 (69)      | 0.50               |
| III-IV                         | 30 (26.1)                              | 4 (30.8)                               |                    | 33 (25.2)       | 10 (31)      |                    |
| <b>B symptoms</b>              |                                        |                                        |                    |                 |              |                    |
| No                             | 74 (64.3)                              | 5 (38.5)                               | 0.079              | 84 (62.7)       | 16 (51.6)    | 0.22               |
| Yes                            | 41 (35.7)                              | 8 (61.5)                               |                    | 50 (37.3)       | 15 (48.4)    |                    |
| <b>Serum LDH</b>               |                                        |                                        |                    |                 |              |                    |
| Normal                         | 33 (30.3)                              | 1 (10)                                 | 0.28               | 39 (31.5)       | 6 (22.2)     | 0.24               |
| Elevated                       | 76 (69.7)                              | 9 (90)                                 |                    | 85 (68.5)       | 21 (77.8)    |                    |
| <b>No. of extranodal sites</b> |                                        |                                        |                    |                 |              |                    |
| 0-1                            | 108 (93.9)                             | 13 (100)                               | 1.0                | 127 (94.8)      | 28 (93.3)    | 0.66               |
| ≥2                             | 7 (6.1)                                | 0 (0)                                  |                    | 7 (5.2)         | 2 (6.7)      |                    |
| <b>ECOG performance status</b> |                                        |                                        |                    |                 |              |                    |
| 0-1                            | 91 (80.5)                              | 13 (100)                               | 0.12               | 111 (83.5)      | 27 (90)      | 0.57               |
| ≥2                             | 22 (19.5)                              | 0 (0)                                  |                    | 22 (16.5)       | 3 (10)       |                    |
| <b>Mediastinal mass size</b>   |                                        |                                        |                    |                 |              |                    |
| ≤10 cm                         | 52 (48.1)                              | 5 (38.5)                               | 0.57               | 60 (49.6)       | 10 (37)      | 0.29               |
| >10 cm                         | 56 (51.9)                              | 8 (61.5)                               |                    | 61 (50.4)       | 17 (63)      |                    |
| <b>IPI risk group</b>          |                                        |                                        |                    |                 |              |                    |
| 0-1                            | 85 (75.9)                              | 7 (58.3)                               | 0.29               | 99 (76.2)       | 19 (67.9)    | 0.33               |
| >1                             | 27 (24.1)                              | 5 (41.7)                               |                    | 31 (23.8)       | 9 (32.1)     |                    |
| <b>Chemotherapy</b>            |                                        |                                        |                    |                 |              |                    |
| R-CHOP                         | 53 (45.7)                              | 8 (61.5)                               | 0.38*              | 70 (51.9)       | 19 (63.3)    | 0.42*              |
| R-EPOCH                        | 44 (37.9)                              | 5 (38.5)                               |                    | 46 (34.1)       | 9 (30)       |                    |
| R-HCVAD                        | 17 (14.7)                              | 0 (0)                                  |                    | 17 (12.9)       | 2 (6.7)      |                    |
| Others                         | 2 (1.7)                                | 0 (0)                                  |                    | 2 (1.5)         | 0 (0)        |                    |
| <b>Therapy response</b>        |                                        |                                        |                    |                 |              |                    |
| CR                             | 96 (83.6)                              | 0 (0)                                  | <b>&lt;0.0001#</b> | 107 (79.3)      | 11 (35.5)    | <b>&lt;0.0001#</b> |
| PR                             | 19 (15.5)                              | 9 (69.2)                               |                    | 23 (17)         | 16 (51.6)    |                    |
| SD                             | 0 (0)                                  | 1 (7.7)                                |                    | 2 (1.5)         | 0 (0)        |                    |
| PD                             | 1 (0.9)                                | 3 (23.1)                               |                    | 3 (2.2)         | 4 (12.9)     |                    |

PET: positron emission tomography; SUV: standardized uptake value; SCT: hematopoietic stem cell transplantation; LDH: lactate dehydrogenase; ECOG: Eastern Cooperative Oncology Group; IPI: International Prognostic Index; R-CHOP: rituximab, cyclophosphamide, doxorubicin, vincristine, and prednisone; R-EPOCH: rituximab, etoposide, prednisone, vincristine, cyclophosphamide, and doxorubicin; R-HCVAD: rituximab, cyclophosphamide, mesna, doxorubicin, vincristine, dexamethasone, methotrexate, and cytarabine; CR: complete response; PR: partial response; SD: stable disease; PD: progressive disease. \*R-CHOP vs. R-EPOCH and R-HCVAD. #CR vs. non-CR. Significant *P* values are in bold.
